# Supplementary material
Source: MDPI journal article supplement (https://www.mdpi.com/2073-4344/11/12/1483)
Supplement: s1 [file s1]

**$^1\text{H}$  NMR Analysis of the Metathesis Reaction between 1-Hexene and (*E*)-Anethole Using Grubbs 2<sup>nd</sup> Generation Catalyst: Effect of Reaction Conditions on (*E*)-1-(4-methoxyphenyl)-1-hexene formation and decomposition**

Marthinus R. Swart, Charlene Marais, and Elizabeth Erasmus\*

*Department of Chemistry, University of the Free State, PO Box 339, Bloemfontein 9300, South Africa*

Supplementary Information

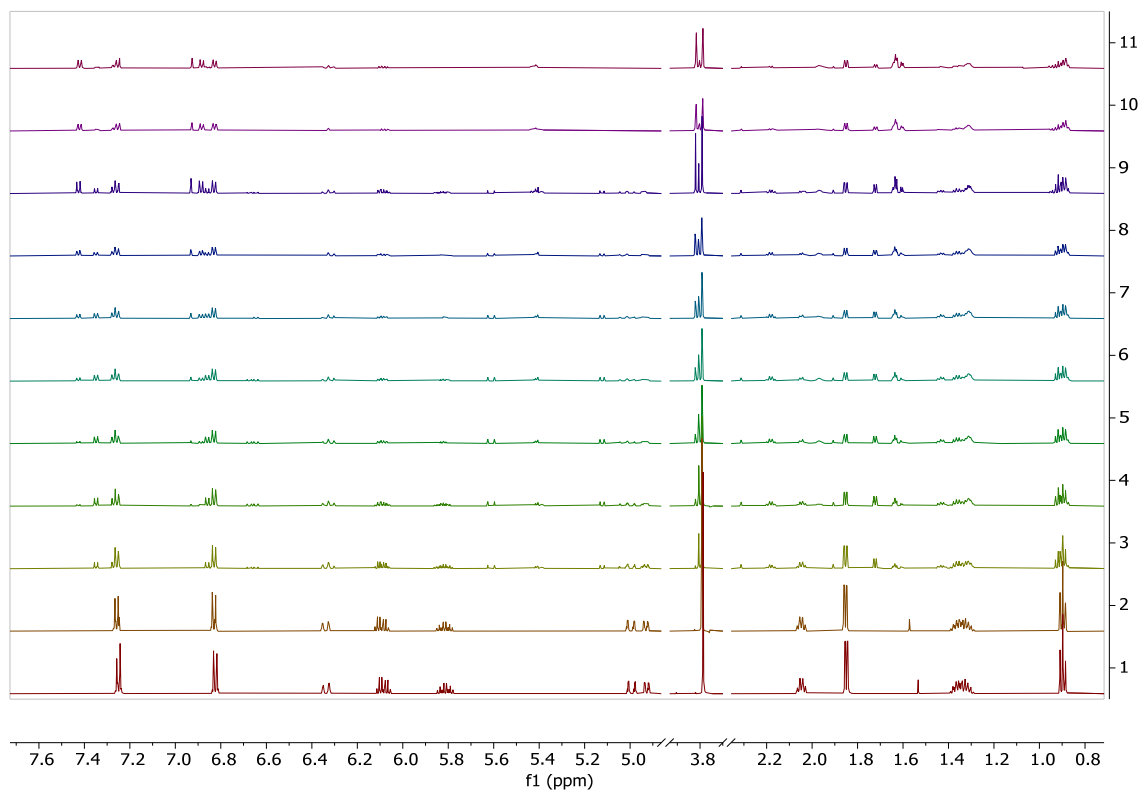

**Figure S1.** The time dependent  $^1\text{H}$  NMR spectra of crude metathesis reaction mixture between (*E*)-anethole and 1-hexene ( $X_{\text{Anethole}} = 0.5$ ) in the presence of Grubbs 2<sup>nd</sup> generation catalyst at 15 °C in  $\text{CDCl}_3$  (experiment 1). The spectra at times  $t = 0$  min. (1),  $t = 4$  min. (2),  $t = 16$  min. (3),  $t = 49$  min. (4),  $t = 102$  min. (5),  $t = 175$  min. (6),  $t = 268$  min. (7),  $t = 371$  min. (8),  $t = 504$  min. (9),  $t = 657$  min. (10) and  $t = 724$  min. (11).

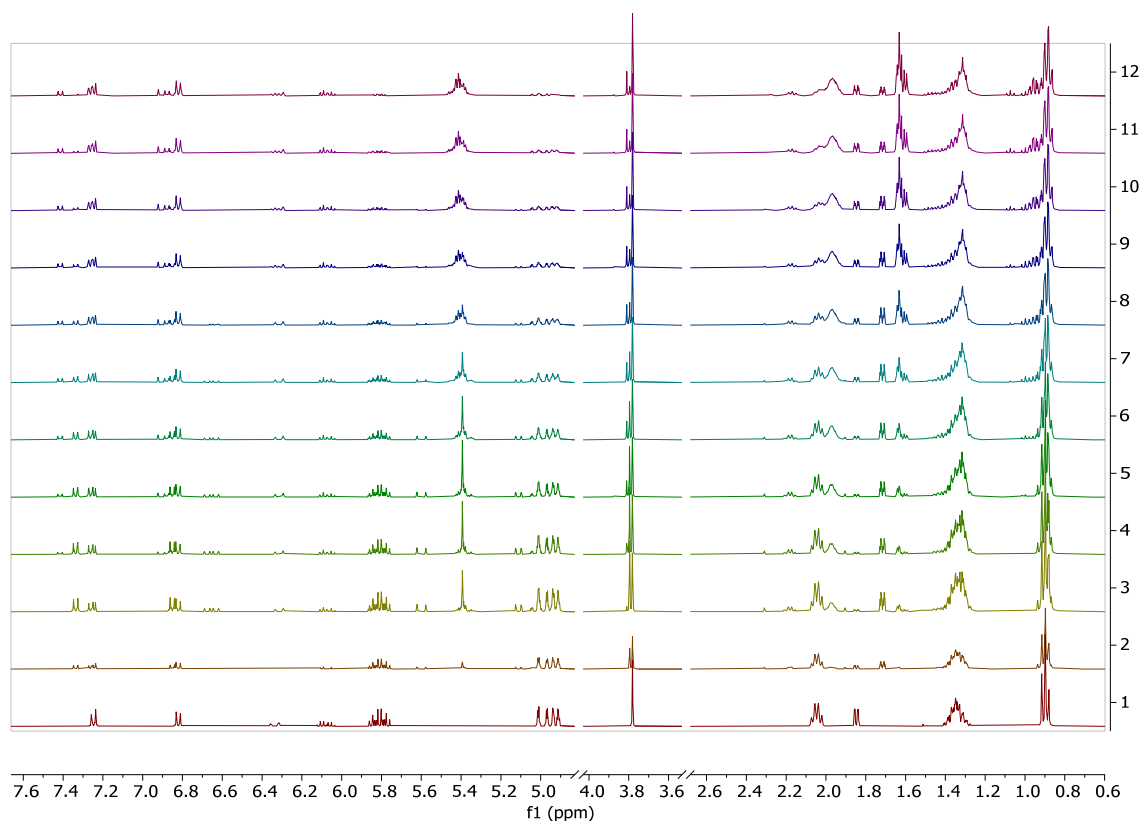

**Figure S2.** The time dependent  $^1\text{H}$  NMR spectra of crude metathesis reaction mixture between (*E*)-anethole and 1-hexene ( $X_{\text{Anethole}} = 0.17$ ) in the presence of Grubbs 2<sup>nd</sup> generation catalyst at 25 °C in  $\text{CDCl}_3$  (experiment 2). The spectra at times  $t=0$  min. (1),  $t=4$  min. (2),  $t=16$  min. (3),  $t=49$  min. (4),  $t=102$  min. (5),  $t=175$  min. (6),  $t=268$  min. (7),  $t=371$  min. (8),  $t=504$  min. (9),  $t=657$  min. (10),  $t=830$  min. (11) and  $t=1023$  min. (12).

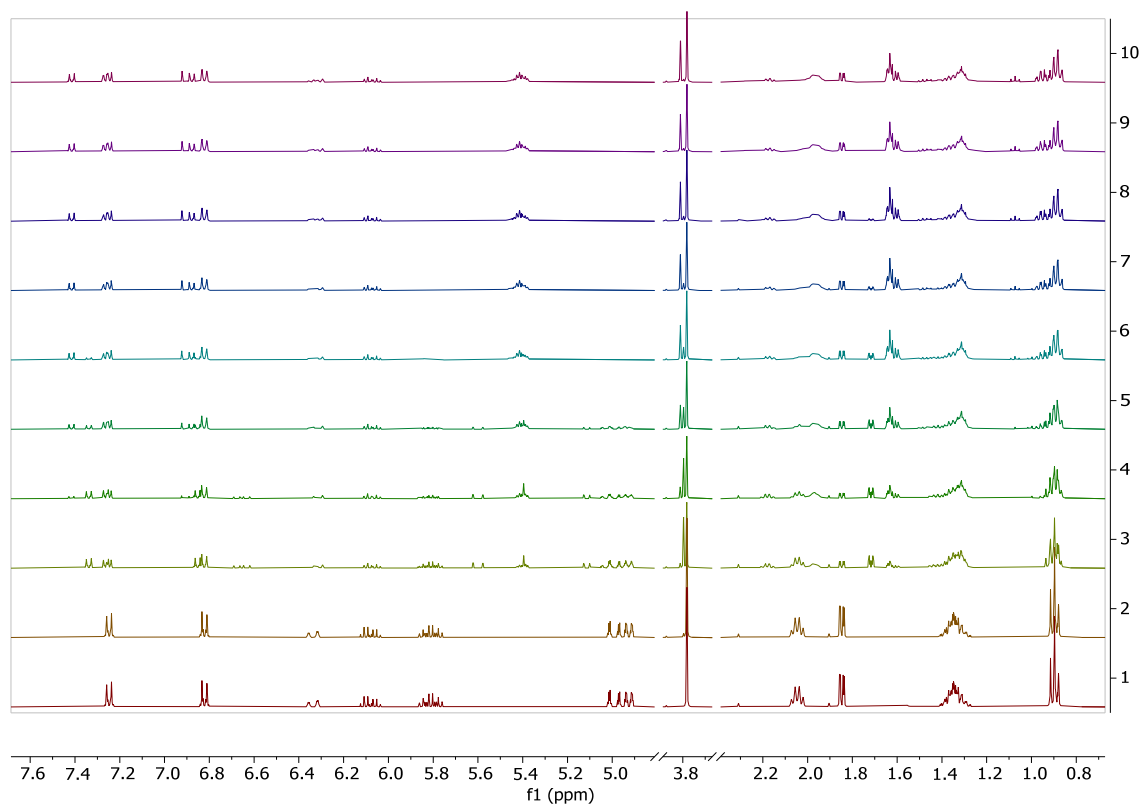

**Figure S3.** The time dependent  $^1\text{H}$  NMR spectra of crude metathesis reaction mixture between (*E*)-anethole and 1-hexene ( $X_{\text{Anethole}} = 0.23$ ) in the presence of Grubbs 2<sup>nd</sup> generation catalyst at 25 °C in  $\text{CDCl}_3$  (experiment 3). The spectra at times  $t=0$  min. (1),  $t=4$  min. (2),  $t=16$  min. (3),  $t=49$  min. (4),  $t=102$  min. (5),  $t=175$  min. (6),  $t=268$  min. (7),  $t=371$  min. (8),  $t=504$  min. (9) and  $t=657$  min. (10).

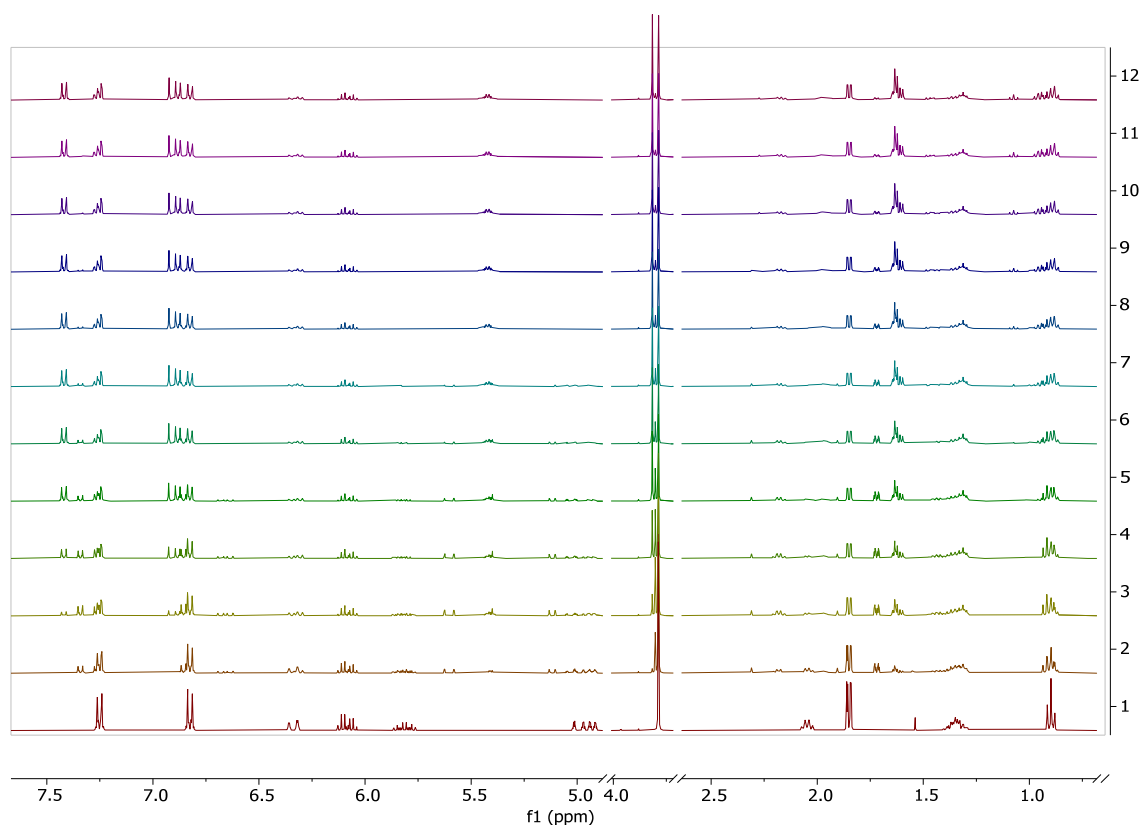

**Figure S4.** The time dependent  $^1\text{H}$  NMR spectra of crude metathesis reaction mixture between (*E*)-anethole and 1-hexene ( $X_{\text{Anethole}} = 0.5$ ) in the presence of Grubbs 2<sup>nd</sup> generation catalyst at 25 °C in  $\text{CDCl}_3$  (experiment 4). The spectra at times  $t=0$  min. (1),  $t=4$  min. (2),  $t=16$  min. (3),  $t=49$  min. (4),  $t=102$  min. (5),  $t=175$  min. (6),  $t=268$  min. (7),  $t=371$  min. (8),  $t=504$  min. (9),  $t=657$  min. (10),  $t=830$  min. (11) and  $t=1023$  min. (12).

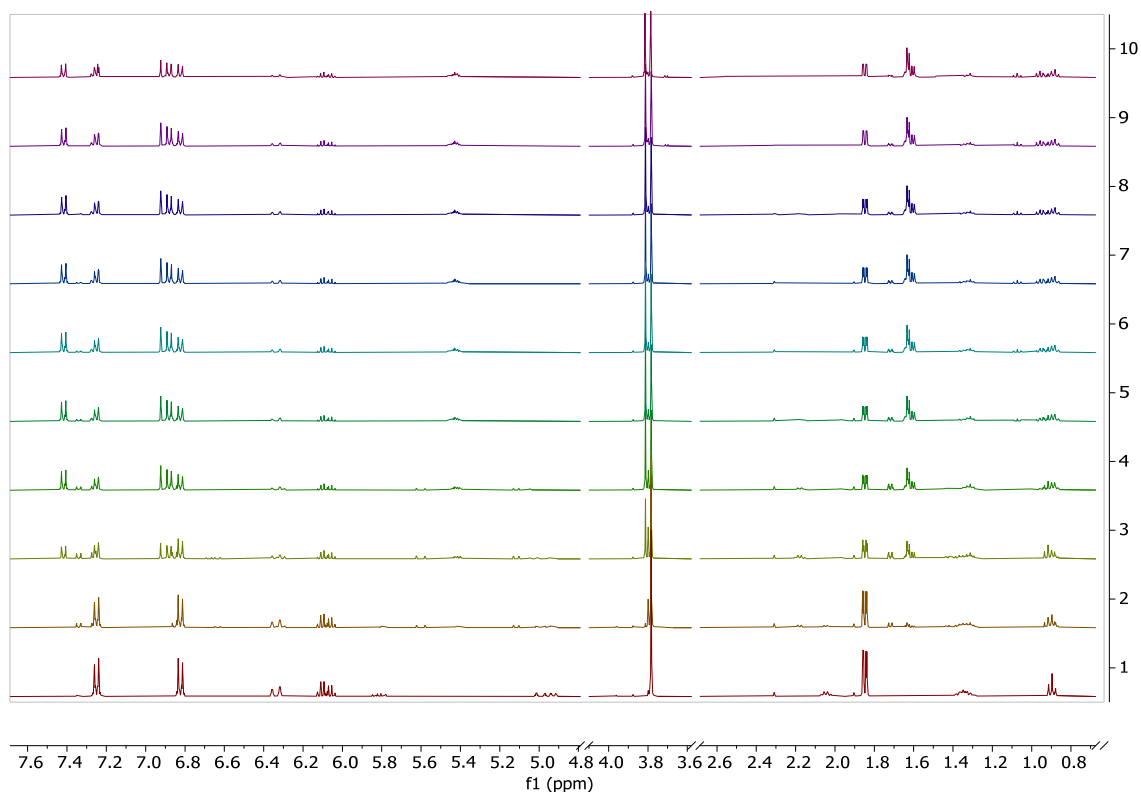

**Figure S5.** The time dependent  $^1\text{H}$  NMR spectra of crude metathesis reaction mixture between (*E*)-anethole and 1-hexene ( $X_{\text{Anethole}} = 0.71$ ) in the presence of Grubbs 2<sup>nd</sup> generation catalyst at 25 °C in  $\text{CDCl}_3$  (experiment 5). The spectra at times  $t=0$  min. (1),  $t=4$  min. (2),  $t=16$  min. (3),  $t=49$  min. (4),  $t=102$  min. (5),  $t=175$  min. (6),  $t=268$  min. (7),  $t=371$  min. (8),  $t=504$  min. (9) and  $t=657$  min. (10).

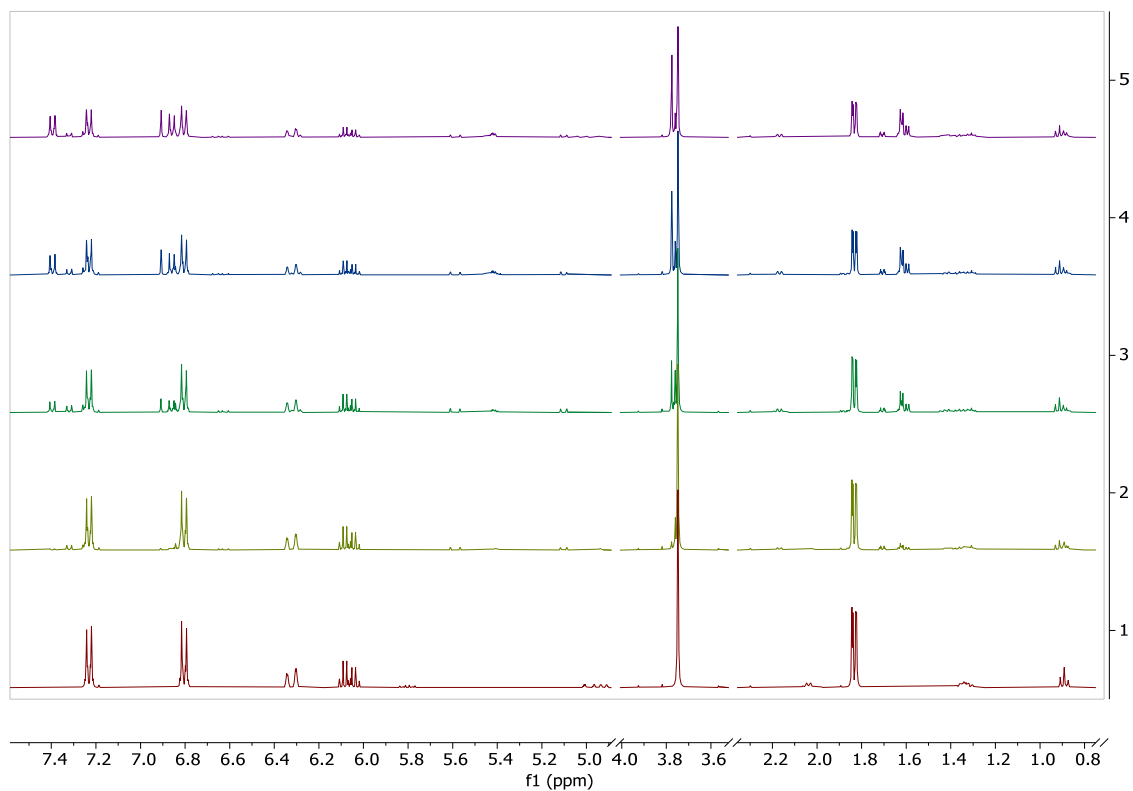

**Figure S6.** The time dependent  $^1\text{H}$  NMR spectra of crude metathesis reaction mixture between (*E*)-anethole and 1-hexene ( $X_{\text{Anethole}} = 0.83$ ) in the presence of Grubbs 2<sup>nd</sup> generation catalyst at 25 °C in  $\text{CDCl}_3$  (experiment 6). The spectra at times  $t=0$  min. (1),  $t=5$  min. (2),  $t=8$  min. (3),  $t=14$  min. (4),  $t=21$  min. (5).

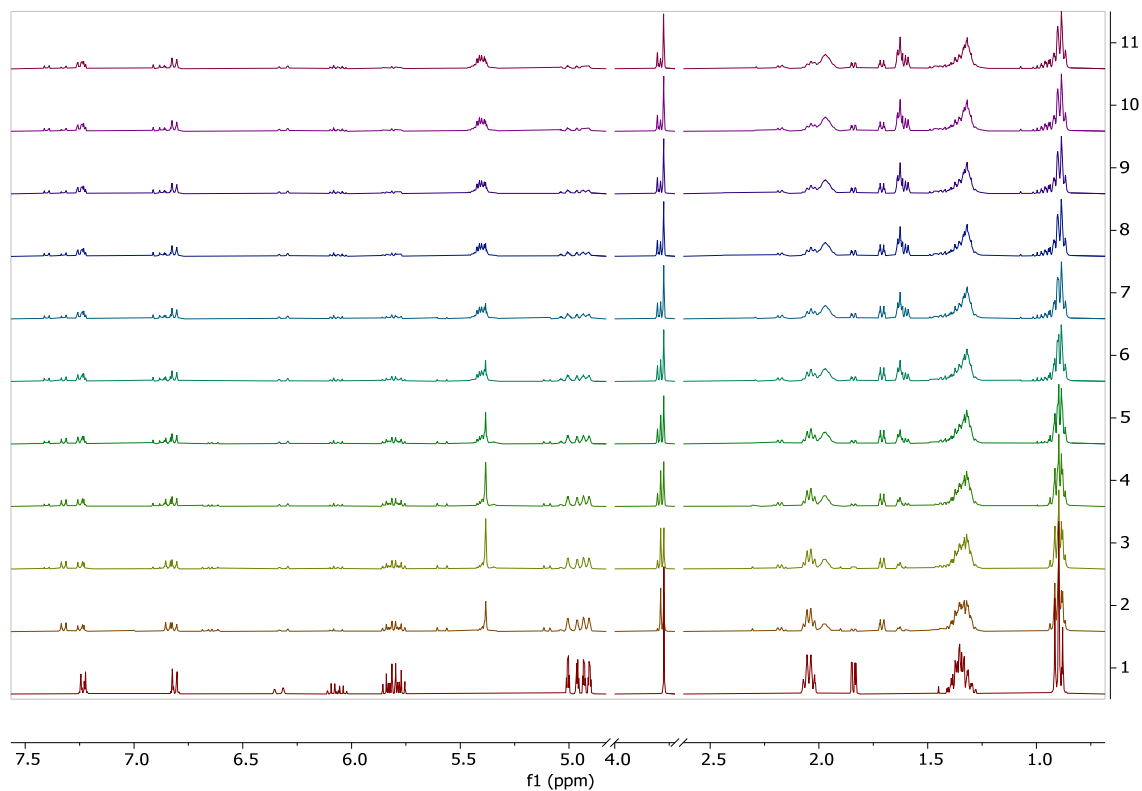

**Figure S7.** The time dependent  $^1\text{H}$  NMR spectra of crude metathesis reaction mixture between (*E*)-anethole and 1-hexene ( $X_{\text{Anethole}} = 0.17$ ) in the presence of Grubbs 2<sup>nd</sup> generation catalyst at 45 °C in  $\text{CDCl}_3$  (experiment 7). The spectra at times  $t=0$  min. (1),  $t=4$  min. (2),  $t=7$  min. (3),  $t=16$  min. (4),  $t=30$  min. (5),  $t=49$  min. (6),  $t=73$  min. (7),  $t=102$  min. (8),  $t=136$  min. (9),  $t=175$  min. (10) and  $t=210$  min. (11).



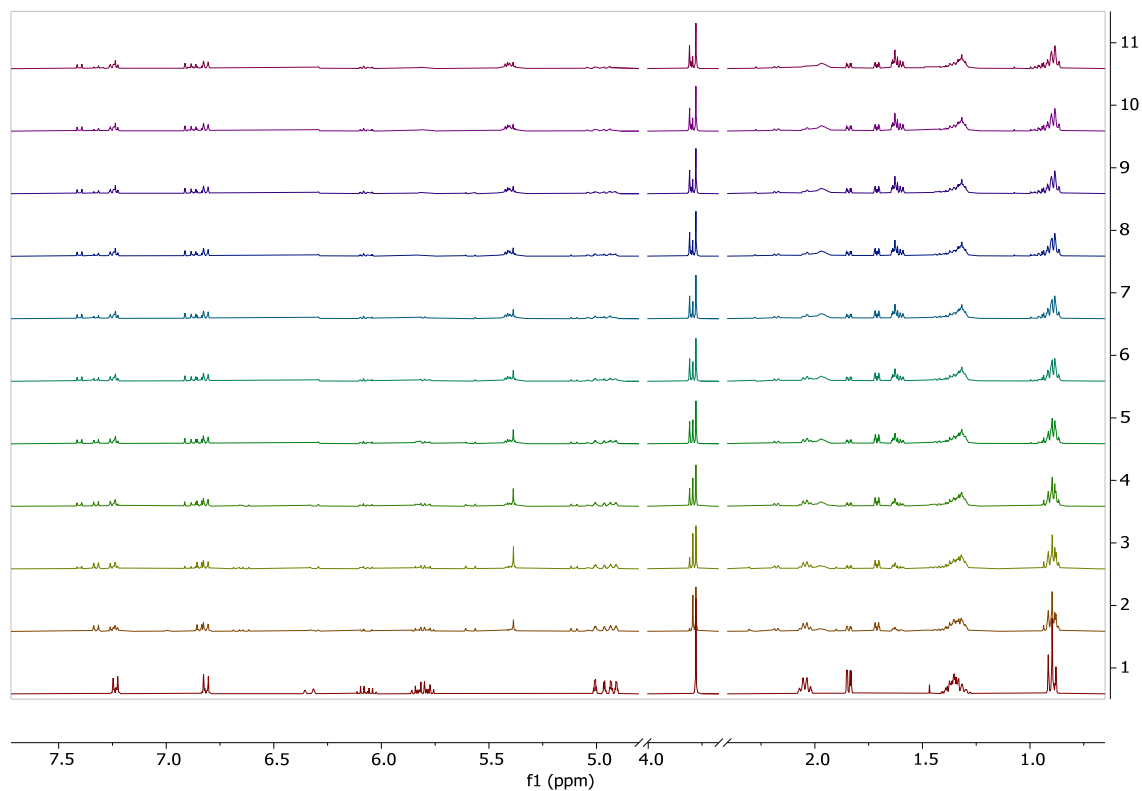

**Figure S8.** The time dependent  $^1\text{H}$  NMR spectra of crude metathesis reaction mixture between (*E*)-anethole and 1-hexene ( $X_{\text{Anethole}} = 0.23$ ) in the presence of Grubbs 2<sup>nd</sup> generation catalyst at 45 °C in  $\text{CDCl}_3$  (experiment 8). The spectra at times  $t=0$  min. (1),  $t=4$  min. (2),  $t=7$  min. (3),  $t=16$  min. (4),  $t=30$  min. (5),  $t=49$  min. (6),  $t=73$  min. (7),  $t=102$  min. (8),  $t=136$  min. (9),  $t=175$  min. (10) and  $t=219$  min. (11).

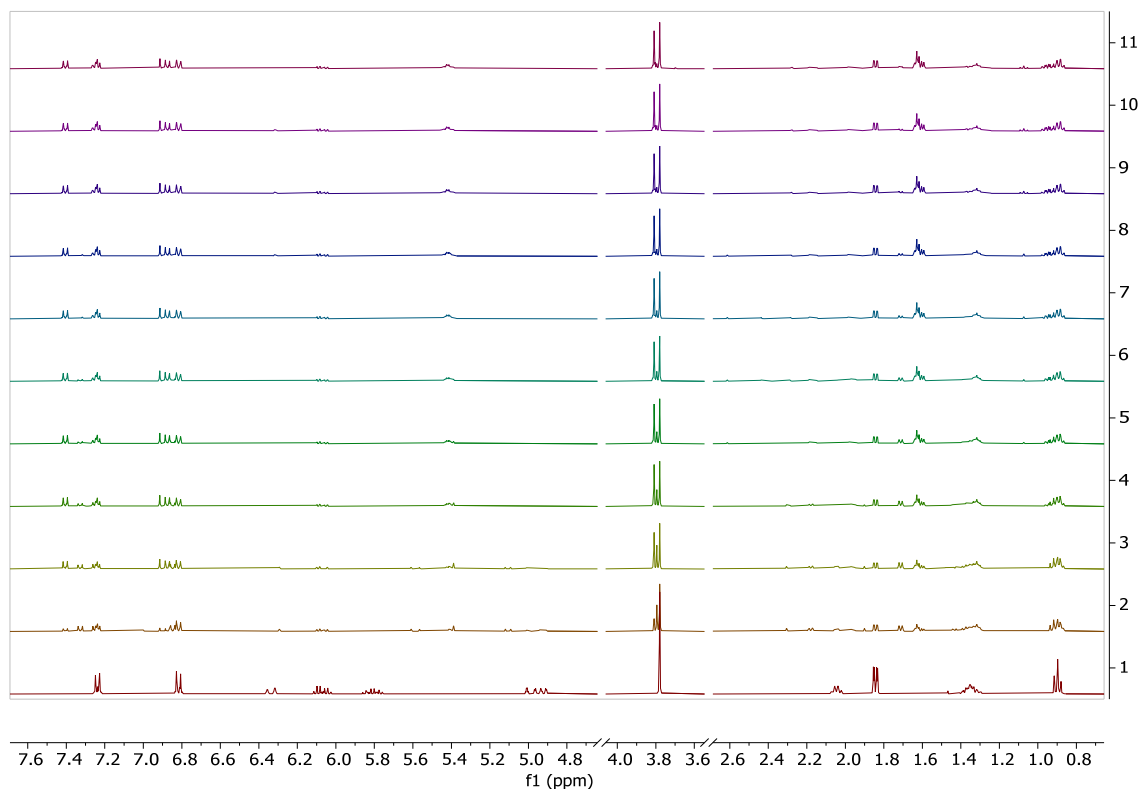

**Figure S9.** The time dependent  $^1\text{H}$  NMR spectra of crude metathesis reaction mixture between (*E*)-anethole and 1-hexene ( $X_{\text{Anethole}} = 0.5$ ) in the presence of Grubbs 2<sup>nd</sup> generation catalyst at 45 °C in  $\text{CDCl}_3$  (experiment 9). The spectra at times  $t=0$  min. (1),  $t=4$  min. (2),  $t=7$  min. (3),  $t=16$  min. (4),  $t=30$  min. (5),  $t=49$  min. (6),  $t=73$  min. (7),  $t=102$  min. (8),  $t=136$  min. (9),  $t=175$  min. (10) and  $t=228$  min. (11).

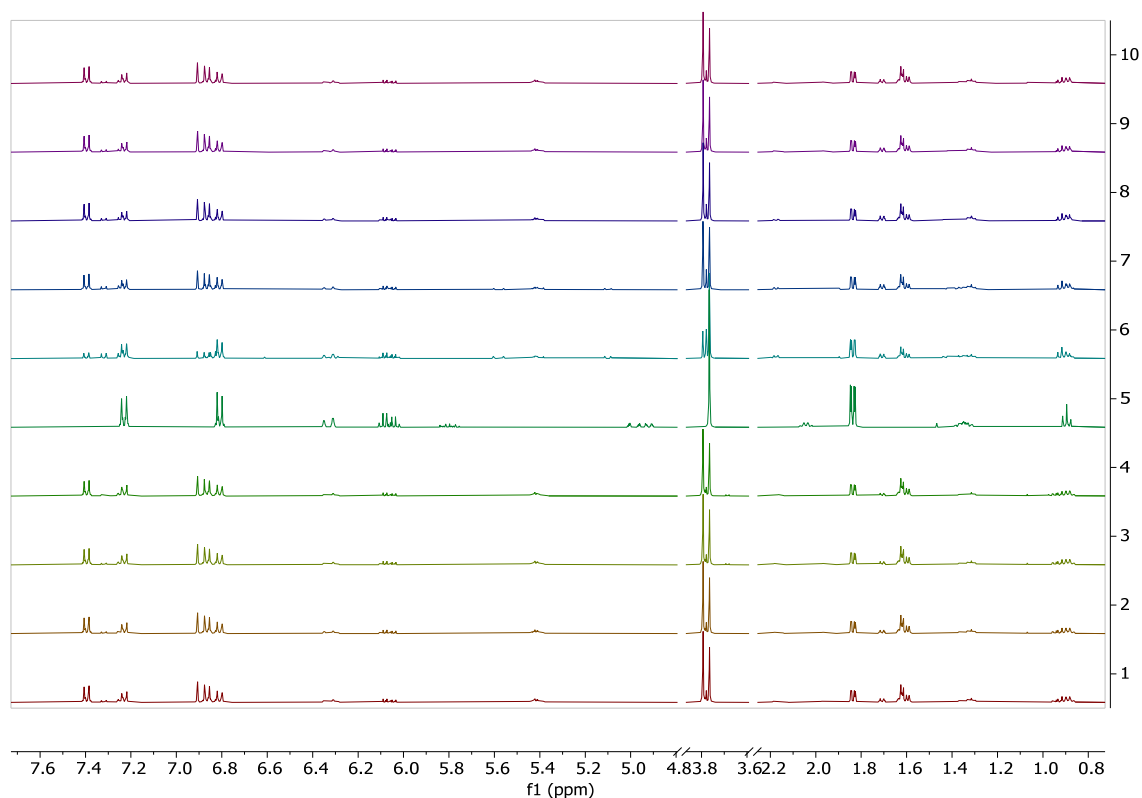

**Figure S10.** The time dependent  $^1\text{H}$  NMR spectra of crude metathesis reaction mixture between (*E*)-anethole and 1-hexene ( $X_{\text{Anethole}} = 0.71$ ) in the presence of Grubbs 2<sup>nd</sup> generation catalyst at 45 °C in  $\text{CDCl}_3$  (experiment 10). The spectra at times  $t=0$  min. (1),  $t=4$  min. (2),  $t=7$  min. (3),  $t=16$  min. (4),  $t=30$  min. (5),  $t=49$  min. (6),  $t=73$  min. (7),  $t=102$  min. (8),  $t=136$  min. (9) and  $t=192$  min. (10).

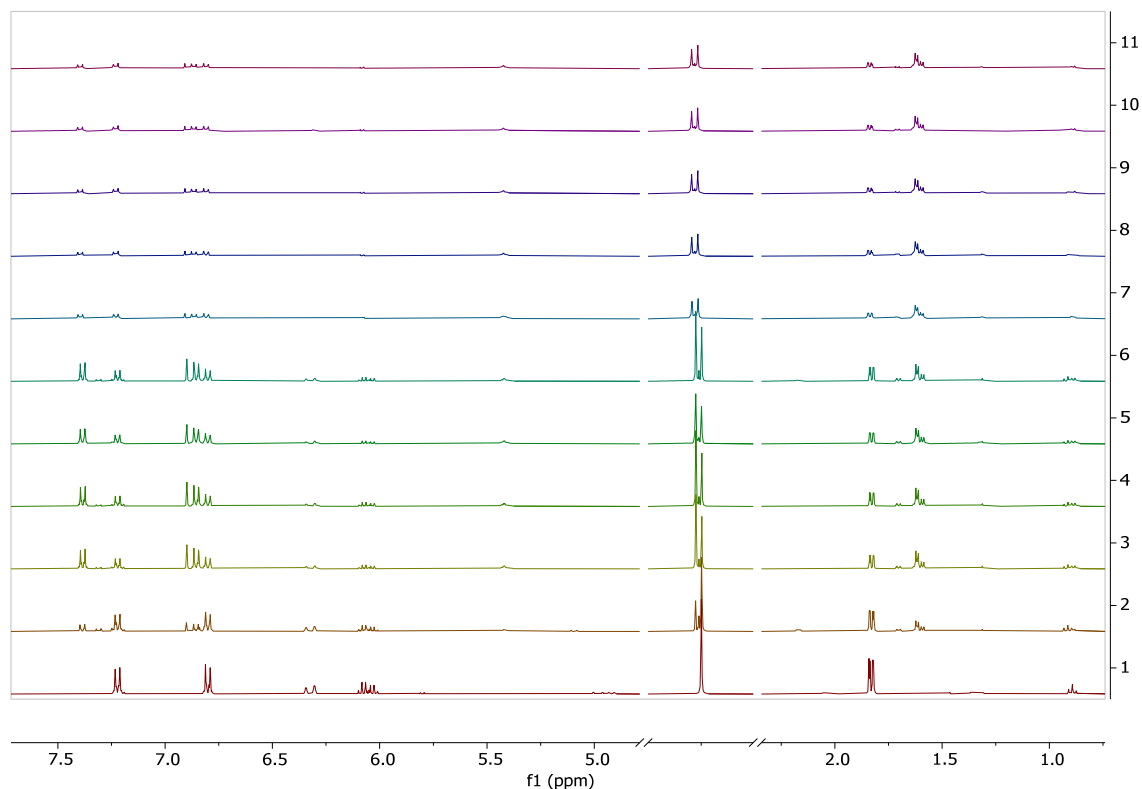

**Figure S11.** The time dependent  $^1\text{H}$  NMR spectra of crude metathesis reaction mixture between (*E*)-anethole and 1-hexene ( $X_{\text{Anethole}} = 0.83$ ) in the presence of Grubbs 2<sup>nd</sup> generation catalyst at 45 °C in  $\text{CDCl}_3$  (experiment 11). The spectra at times  $t=0$  min. (1),  $t=4$  min. (2),  $t=7$  min. (3),  $t=16$  min. (4),  $t=30$  min. (5),  $t=49$  min. (6),  $t=73$  min. (7),  $t=102$  min. (8),  $t=136$  min. (9),  $t=175$  min. (10) and  $t=201$  min. (11).

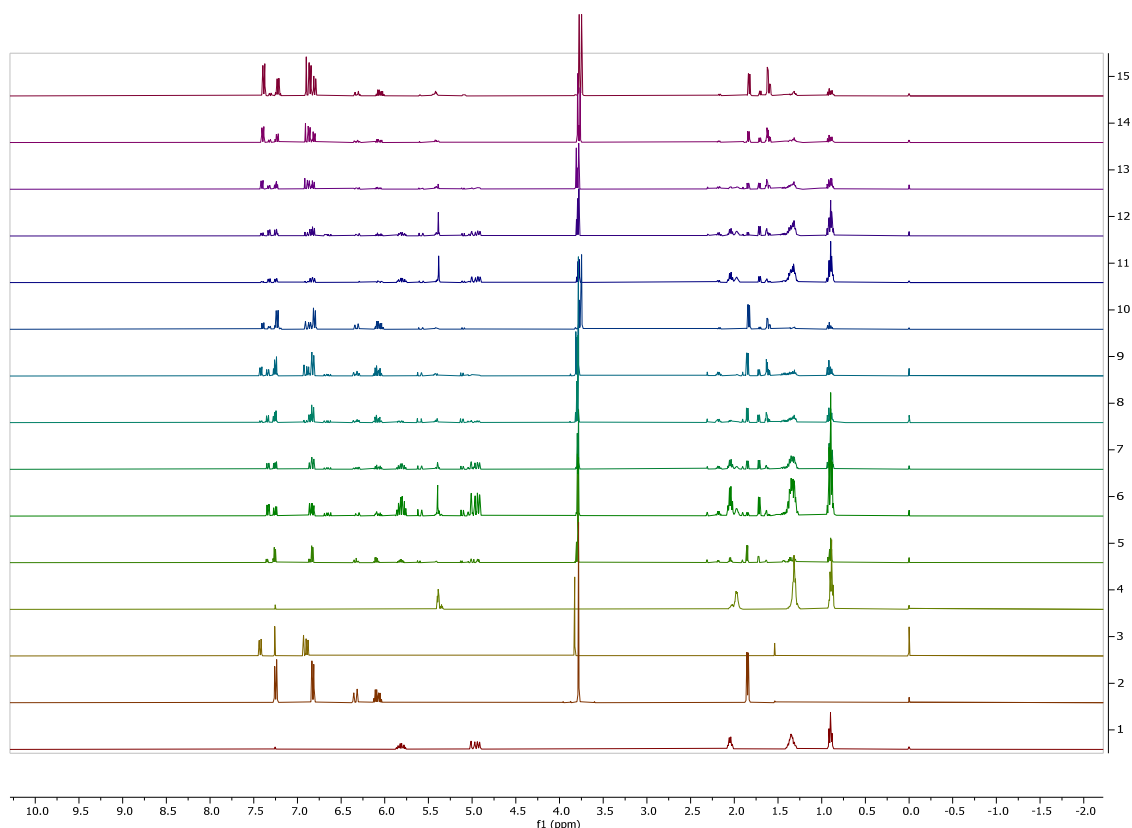

**Figure S12.** Expanded  $^1\text{H}$  NMR spectra of reagents (1) 1-hexene (**1**); (2) (*E*)-anethole (**2**); (3) SM product of (**2**), (*E*)-4,4'-dimethoxystilbene (**7**); (4) SM product of (**1**), (*E*)-5-decene (**5**); and the crude metathesis reaction mixture between (*E*)-anethole and 1-hexene in the presence of Grubbs 2<sup>nd</sup> generation at  $t=10$  min. in  $\text{CDCl}_3$  for (5)  $X_{\text{Anethole}} = 0.5$  at 15  $^\circ\text{C}$ ; (6)  $X_{\text{Anethole}} = 0.17$  at 25  $^\circ\text{C}$ ; (7)  $X_{\text{Anethole}} = 0.29$  at 25  $^\circ\text{C}$ ; (8)  $X_{\text{Anethole}} = 0.5$  at 25  $^\circ\text{C}$ ; (9)  $X_{\text{Anethole}} = 0.71$  at 25  $^\circ\text{C}$ ; (10)  $X_{\text{Anethole}} = 0.83$  at 25  $^\circ\text{C}$ ; (11)  $X_{\text{Anethole}} = 0.17$  at 45  $^\circ\text{C}$ ; (12)  $X_{\text{Anethole}} = 0.29$  at 45  $^\circ\text{C}$ ; (13)  $X_{\text{Anethole}} = 0.5$  at 45  $^\circ\text{C}$ ; (14)  $X_{\text{Anethole}} = 0.71$  at 45  $^\circ\text{C}$  and; (15)  $X_{\text{Anethole}} = 0.83$  at 45  $^\circ\text{C}$ .

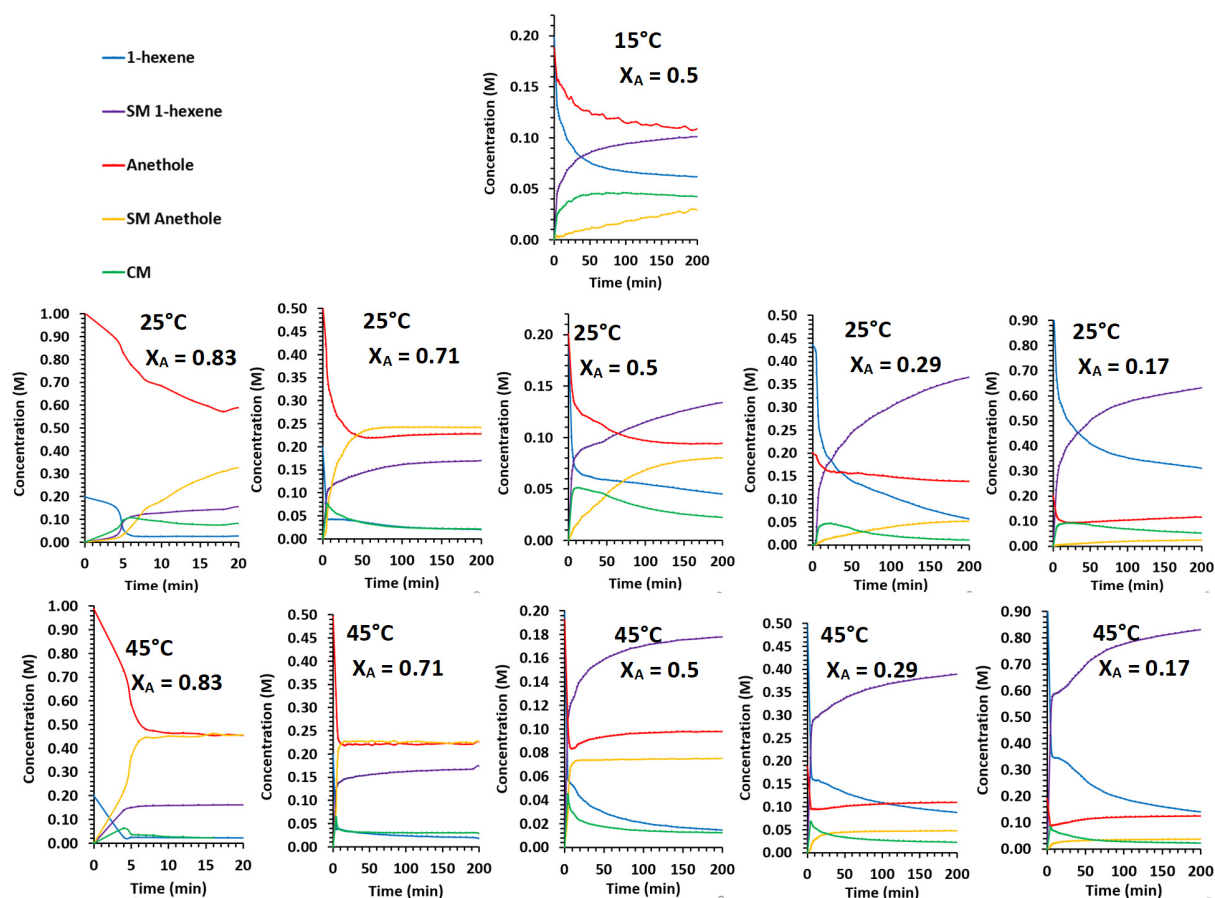

**Figure S13.** The time trace of the Grubbs' 2<sup>nd</sup> generation catalysed metathesis reaction between 1-hexene (**1**) and (*E*)-anethole (**2**) at 15 °C (top row), 25 °C (middle row), and 45 °C (bottom row), the mole fraction of anethole is indicated on each graph. (*E*)-anethole (**2**, red -), and 1-hexene (**1**, blue -), and the formation of the different products, CM (**3**, green -), SM 1-hexene (**5**, purple -) and SM (*E*)-anethole (**7**, orange -).

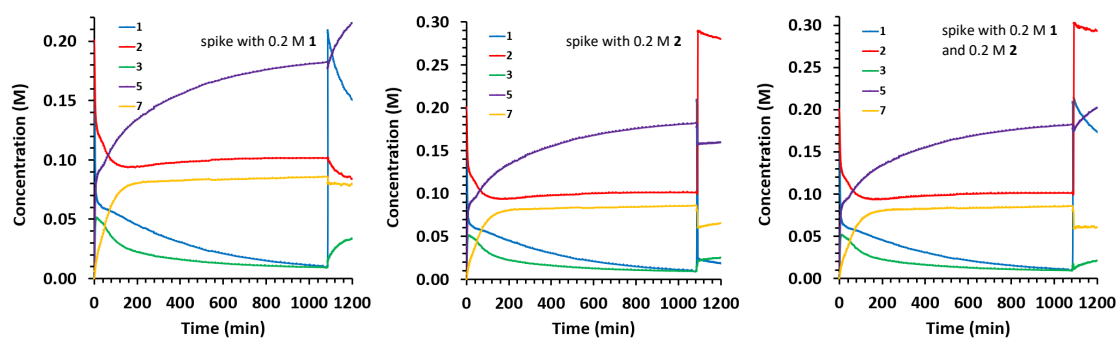

**Figure S14.** The time trace of the Grubbs' 2<sup>nd</sup> generation catalysed (*E*)-anethole and 1-hexene ( $X_{\text{Anethole}} \approx 0.5$ ) reaction at 25 °C in  $\text{CDCl}_3$  spiked with (A) 0.2 M **1** (experiment 12), (B) 0.2 M **2** (experiment 13) and (C) 0.2 M **1** and 0.2 M **2** at 1086 min (experiment 14).

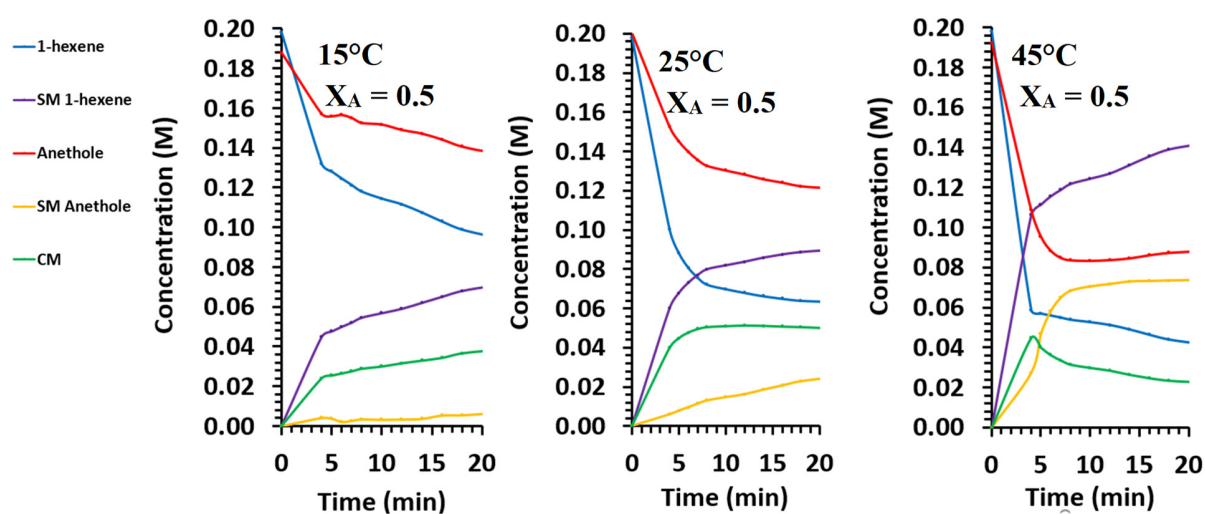

**Figure S15.** The time traces of the of the initial 20 min of the Grubbs' 2<sup>nd</sup> generation catalysed metathesis reaction between 1-hexene (**1**) and (*E*)-anethole (**2**) at 15 °C (left), 25 °C (middle), and 45 °C (right), the mole fraction of anethole is indicated on each graph.

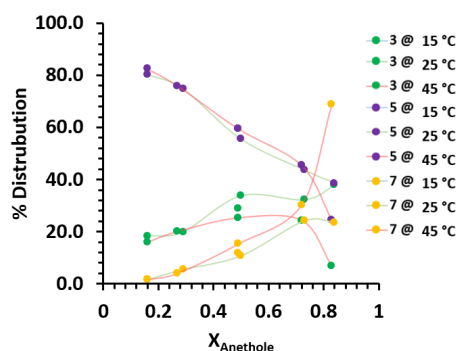

**Figure S16.** Graph of % distribution of metathesis products **3**, **5**, and **7** vs  $X_{\text{Anethole}}$  at the different temperatures (as indicated) at the time where  $[3]_{\text{max}}$  was reached.

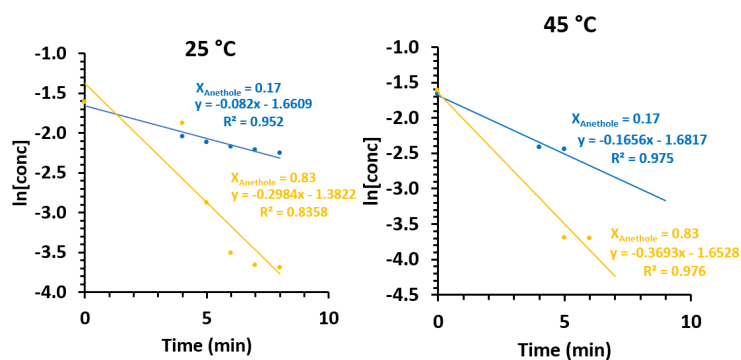

**Figure S17.** The kinetic plots of the disappearance of **1** (blue) and **2** (yellow) at (left) 25 °C and (right) 45 °C for the metathesis reactions (at the indicated  $X_{\text{Anethole}}$ ) that leads to the apparent observed first order rate constant  $k'_{\text{obs}}$ .



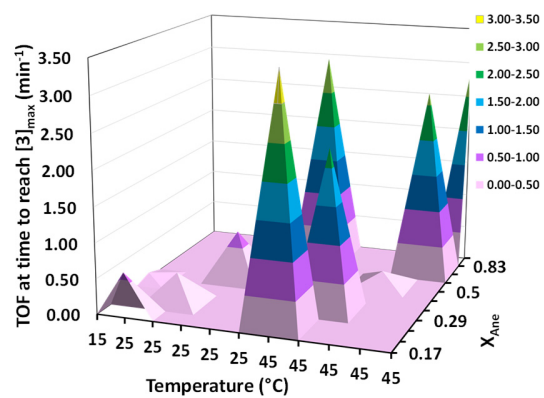

**Figure S18.** Graph comparing the TOF at the time when  $[3]_{\max}$  is reached against the reaction conditions.
